# Supplementary material
Source: PubMed Central journal article supplement (PMC4835963)
Supplement: kaup-12-04-1157237-s001.pdf [file kaup-12-04-1157237-s001.pdf]

## **Supplementary data**

### **Phosphorylation of Atg9 regulates movement to the phagophore assembly site and the rate of autophagosome formation**

Yuchen Feng, Steven K. Backues, Misuzu Baba, Jin-mi Heo, J. Wade Harper and Daniel J.

Klionsky

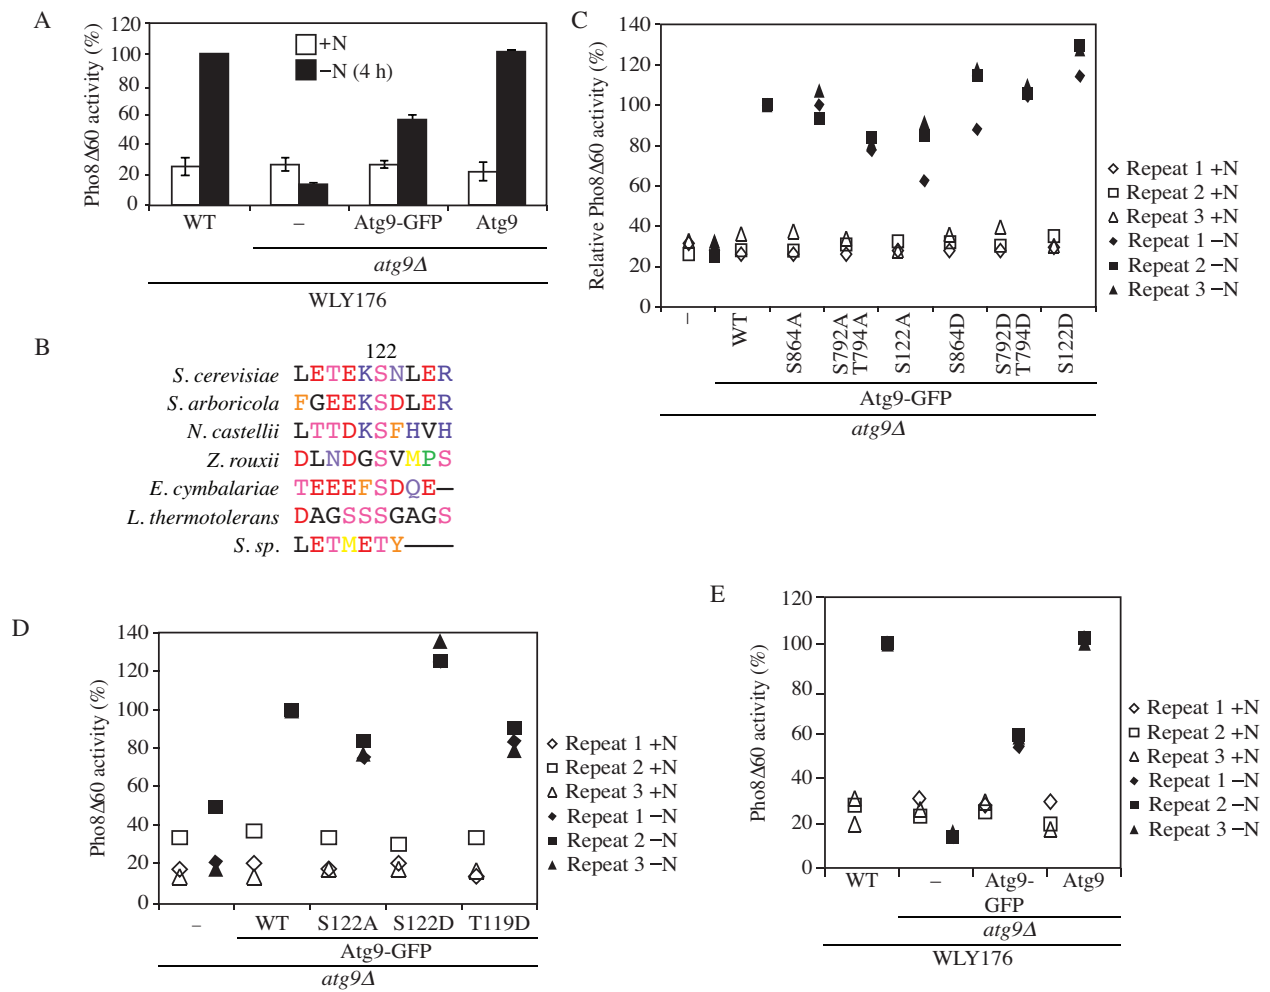

**Figure S1.** Phosphorylation of Atg9 S122 is important for nonselective autophagy. **(A)**

Untransformed WLY176 (WT) or WLY176 *atg9Δ* cells transformed with an empty vector or a pRS406 plasmid expressing either untagged Atg9 or Atg9-GFP, and assayed for Pho8Δ60

activity after 4 h nitrogen starvation as described in *Materials and Methods*. Error bars

correspond to the standard deviation and were obtained from 3 independent repeats. **(B)**

Alignment of the N terminus of Atg9 throughout different species. **(C-E)** Results of **(C)** Figure

1B, **(D)** Figure 1C and **(E)** Figure S1 are displayed, showing 3 independent repeats as

scatterplots.

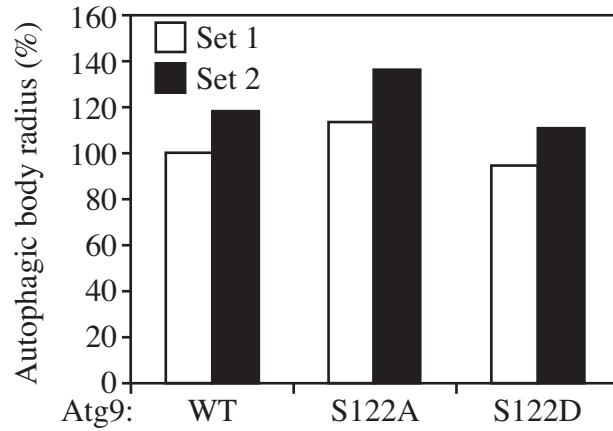

**Figure S2.** Phosphorylation of Atg9 S122 does not affect the size of autophagosomes. Estimated average radius of autophagic bodies in WT and mutant Atg9 after 4 h of nitrogen starvation. The estimation was based on the radius of autophagic body cross sections observed by TEM in 2 independent experiments done by 2 different labs of more than 100 cells each for each strain.

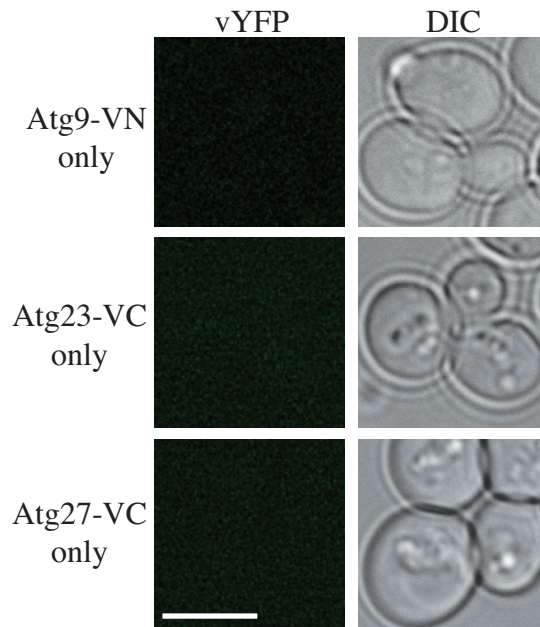

**Figure S3.** Phosphorylation of S122 is important for the interaction of Atg9 with Atg23 and Atg27. Representative fluorescence microscopy images of cells expressing only WT Atg9-VN, Atg23-VC or Atg27-VC. Cells were cultured, collected and imaged as in Figure 5. Scale bars: 5  $\mu\text{m}$ .

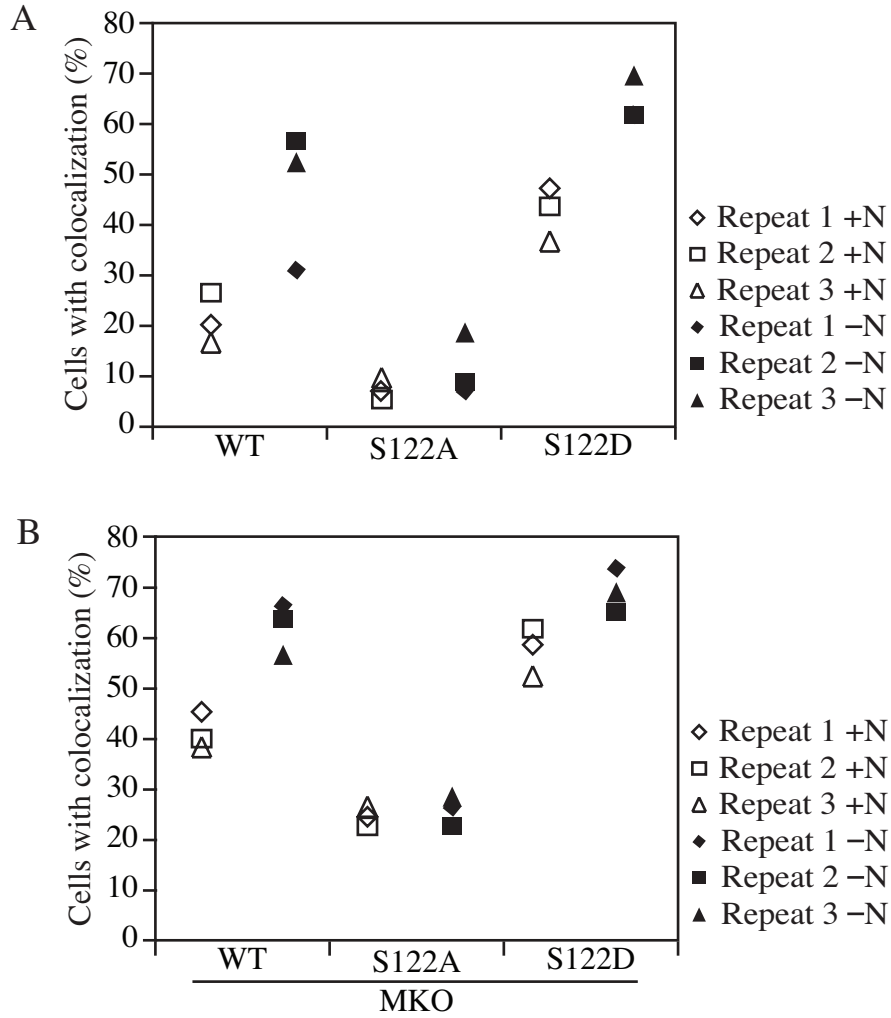

**Figure S4.** Phosphorylation of S122 is important for Atg9 anterograde trafficking. (A-B) Results of the quantification of colocalization between Atg9-GFP and RFP-Ape1 from (A) Figure 4B and (B) Figure 4D are displayed, showing 3 independent repeats as scatterplots.

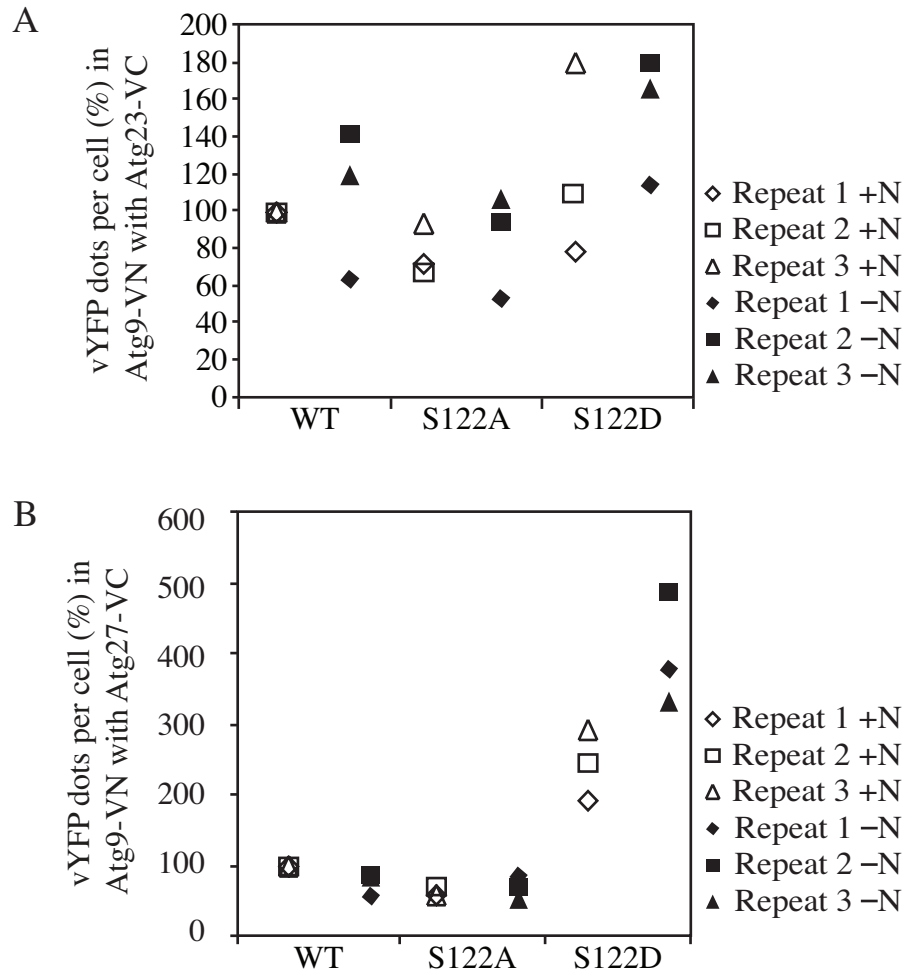

**Figure S5.** Phosphorylation of Atg9 S122 is important for the interaction of Atg9 with Atg23 and Atg27. Results of the quantification of colocalization between Atg9-GFP and RFP-Ape1 in (A) Figure 5B and (B) Figure 5D are displayed, showing 3 independent repeats as scatterplots.
